# Supplementary material for: Environmental selection of protistan plankton communities in hypersaline anoxic deep-sea basins, Eastern Mediterranean Sea
Source: PubMed Central journal article supplement (PMC3584213; doi:10.1002/mbo3.56), 2012-12-13

Suppl. Fig. 1

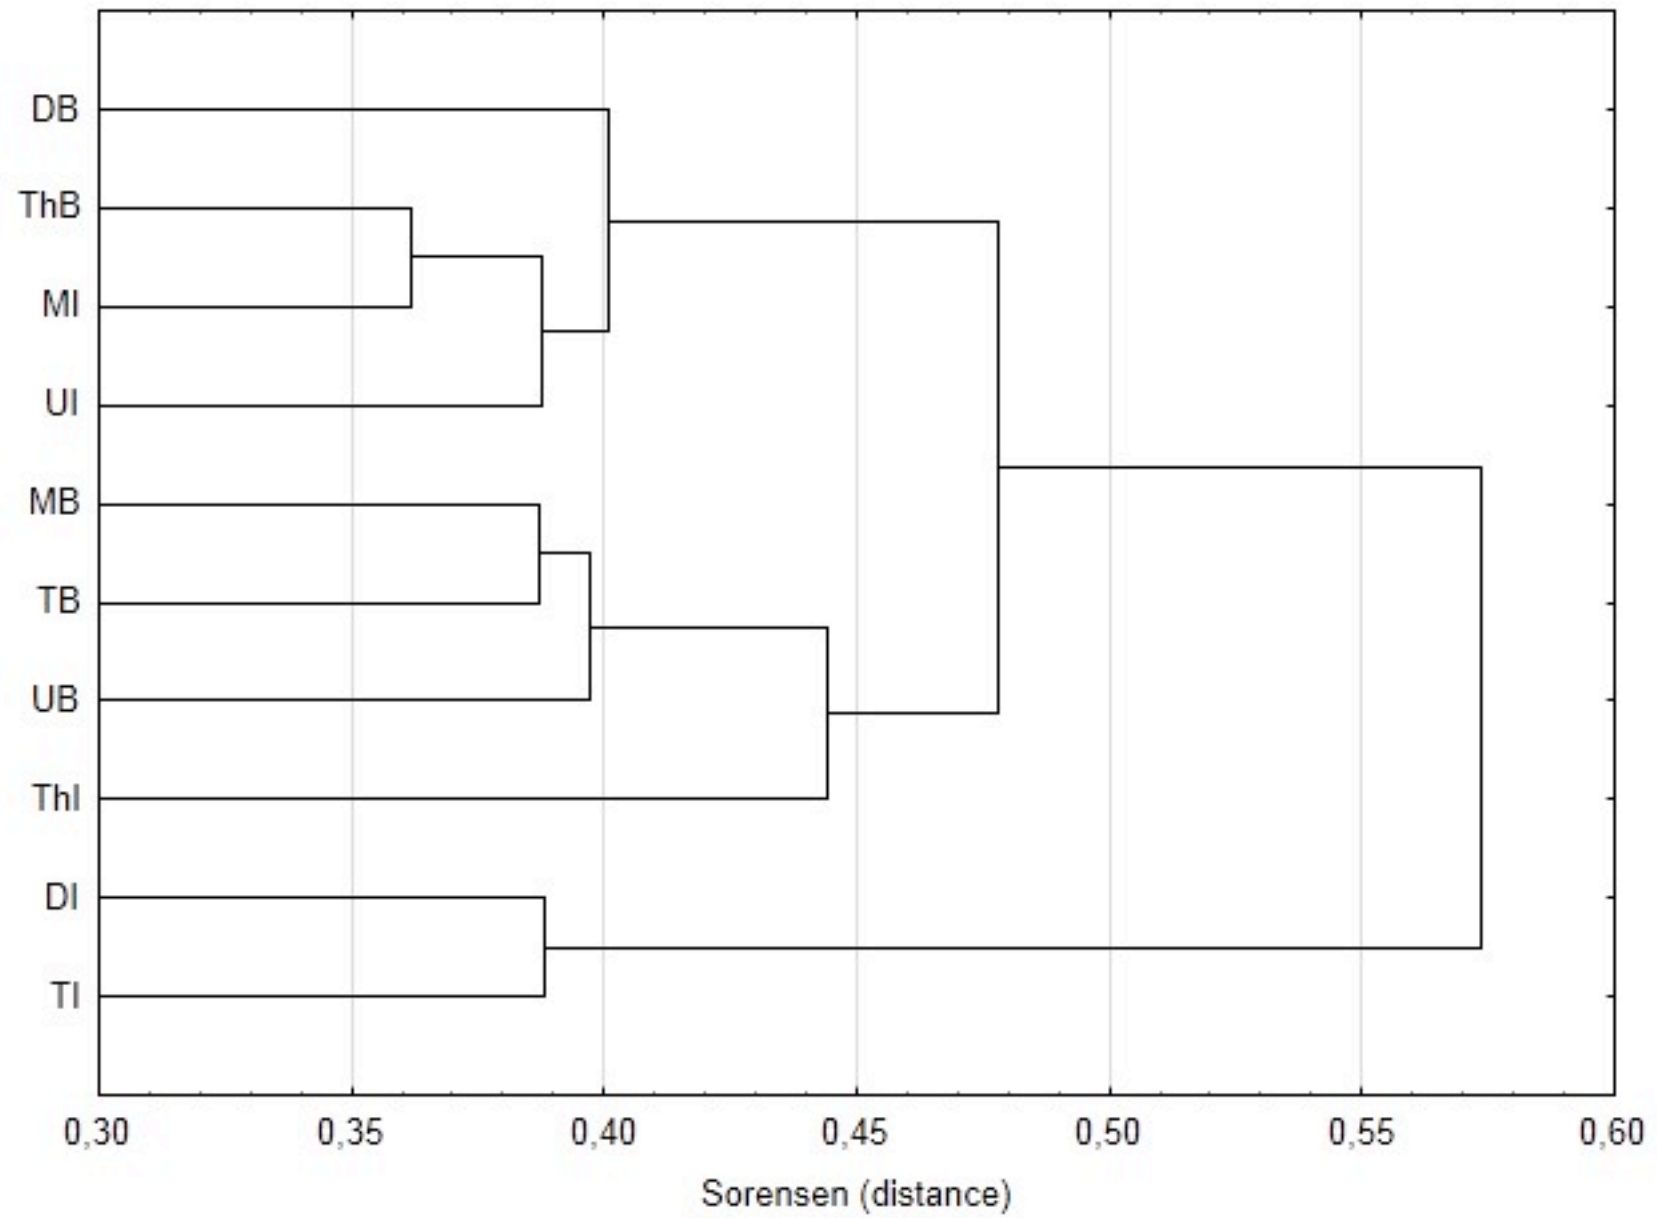

Supplement: mbo30002-0054-SD1.pdf [file mbo30002-0054-SD1.pdf]
